# Supplementary material for: A molecular mechanism of mitotic centrosome assembly in Drosophila
Source: eLife. 2014 Aug 22;3:e03399. doi: 10.7554/eLife.03399 (PMC4175739; doi:10.7554/eLife.03399)
Supplement: Figure 6—source data 1. — (Related to Figure 6) A yeast-2-hybrid analysis was carried out using various bait and prey fragments of each protein (as indicated in columns A and B). Three different reporters were tested—His (columns C–F), Ade (columns G and H), and LacZ (column I). Interaction levels are indicated as strong, medium, weak, or none. All combinations of baits and preys were tested, but only those that scored positive in at least one assay are shown. DOI: http://dx.doi.org/10.7554/eLife.03399.015 [file elife03399s001.xlsx]

## Sheet: Y2H interactors
Table S1
Bait fragment	Prey fragment	His autoactivation of bait?	Concentration of 3AT needed to supress His autoactivation	His Interaction level (with 3AT concentration used)	Retest of His autoactivation after removal of prey plasmid	Ade autoactivation of bait?	Ade Interaction level	LacZ Interaction level
Asl 606-994	Asl 606-994	y	5 mM	his 5mM m		n	weak	autoactivates
Asl 606-994	Asl 797-994	y	5 mM	his 5mM w		n	weak	autoactivates
Asl 606-994	Asl 1-994	y	5 mM	his 5mM s		n		autoactivates
Asl 606-994	Asl 399-994	y	5 mM	his 5mM s		n	weak	autoactivates
Asl 606-994	Asl 1-803	y	5 mM	his 5mM m		n		autoactivates
Asl 606-994	Asl 204-803	y	5 mM	his 5mM w		n		autoactivates
Asl 606-994	Asl 204-994	y	5 mM	his 5mM s		n	weak	autoactivates
Asl 606-994	Cnn 1-608	y	5 mM	his 5mM s		n		autoactivates
Asl 606-994	Cnn 1-816	y	5 mM	his 5mM m		n		autoactivates
Asl 606-994	Cnn 196-816	y	5 mM	his 5mM m		n		autoactivates
Asl 291-994	Asl 606-994	n				n	weak	weak
Asl 291-994	Asl 606-803	n				n	weak
Asl 291-994	Asl 797-994	n				n	weak
Asl 291-994	Asl 1-994	n				n	strong	weak
Asl 291-994	Asl 399-803	n				n	medium
Asl 291-994	Asl 399-994	n		his 0mM s		n	strong
Asl 291-994	Asl 399-612	n				n	weak
Asl 291-994	Asl 1-405	n				n	medium	medium
Asl 291-994	Asl 1-803	n		his 0mM s		n	weak
Asl 291-994	Asl 1-612	n				n	weak	medium
Asl 291-994	Asl 204-803	n				n	medium
Asl 291-994	Asl 204-994	n				n	medium	medium
Asl 291-994	Asl 204-405	n				n	medium	medium
Asl 1-994	Asl 606-994	y	>40 mM	His 60mM m		y	medium
Asl 1-994	Asl 399-803	y	>40 mM			y	medium
Asl 1-994	Asl 399-994	y	>40 mM	His 60mM s		y	medium
Asl 1-994	Asl 1-405	y	>40 mM	His 60mM s	fails retest	y	strong	weak
Asl 1-994	Asl 1-803	y	>40 mM			y	medium	weak
Asl 1-994	Asl 1-612	y	>40 mM	His 60mM m	fails retest	y	medium	weak
Asl 1-994	Asl 204-803	y	>40 mM	His 60mM m		y	strong	weak
Asl 1-994	Asl 204-994	y	>40 mM	His 60mM s		y	medium	weak
Asl 1-994	Asl 204-405	y	>40 mM	His 60mM m	fails retest	y	medium	weak
Asl 1-994	Cnn 1-816	y	>40 mM			y	medium	weak
Asl 1-994	Cnn 196-816	y	>40 mM			y	medium	weak
Asl 1-994	DSpd-2 437-875	y	>40 mM			y	medium
Asl 1-994	DSpd-2 654-1078	y	>40 mM	His 60mM m		y	medium
Asl 1-994	DSpd-2 1-208	y	>40 mM			y	weak
Asl 1-994	DSpd-2 1-443	y	>40 mM	His 60mM m		y	strong
Asl 291-612	Asl 1-994	n		his 0mM s		n
Asl 291-612	Asl 1-803	n		his 0mM s		n
Asl 291-612	Asl 1-612	n		his 0mM s		n
Asl 291-612	Asl 204-803	n		his 0mM s		n
Asl 291-612	Asl 204-994	n		his 0mM s		n		medium
Asl 1-297	Asl 1-994	y	40 mM	his 40mM m		n	weak	weak
Asl 1-297	Asl 1-405	Y	40 mM	his 40mM s		n	strong	strong
Asl 1-297	Asl 1-803	y	40 mM	his 40mM m		n	weak
Asl 1-297	Asl 1-612	Y	40 mM	his 40mM m		n	weak	strong
Asl 1-612	Asl 1-994	y	>40 mM	his 40mM s		y	weak
Asl 1-612	Asl 1-405	y	>40 mM	his 40mM s		y	strong
Asl 1-612	Asl 1-803	y	>40 mM	his 40mM s		y	strong
Asl 1-612	Asl 1-612	y	>40 mM	his 40mM s		y	strong
Asl 1-612	Asl 204-803	y	>40 mM	his 40mM m		y	weak
Asl 1-612	Asl 204-994	y	>40 mM	his 40mM s		y	weak
Cnn 602-1149	Cnn 403-608	n		his 0mM s		n	weak	medium
Cnn 602-1149	Cnn 403-1002	n		his 0mM s		n		strong
Cnn 602-1149	Cnn 403-1149	n		his 0mM s		n		weak
Cnn 602-1149	Cnn 602-1149	n		his 0mM s		n
Cnn 602-1149	Cnn 1-608	n		his 0mM s		n	medium
Cnn 602-1149	Cnn 1-816	n		his 0mM s		n		weak
Cnn 602-1149	Cnn 196-1002	n		his 0mM s		n		weak
Cnn 602-1149	Cnn 196-608	n		his 0mM s		n	medium	medium
Cnn 602-1149	Cnn 196-816	n		his 0mM s		n
Cnn 299-1149	Cnn 1-1149	n		his 0mM s		n
Cnn 299-1149	Cnn 403-608	n		his 0mM s		n	medium
Cnn 299-1149	Cnn 403-1149	n		his 0mM s		n
Cnn 299-1149	Cnn 403-1002	n		his 0mM s		n	medium
Cnn 299-1149	Cnn 602-1149	n		his 0mM s		n	weak	weak
Cnn 299-1149	Cnn 1-608	n		his 0mM s		n	weak
Cnn 299-1149	Cnn 1-816	n		his 0mM s		n
Cnn 299-1149	Cnn 196-1002	n		his 0mM s		n	weak
Cnn 299-1149	Cnn 196-608	n		his 0mM s		n	medium
Cnn 299-1149	Cnn 196-816	n		his 0mM s		n
Cnn 1-1149	Cnn 1-1149	n		his 0mM s		n
Cnn 1-1149	Cnn 403-608	n		his 0mM s		n	medium	weak
Cnn 1-1149	Cnn 403-1149	n		his 0mM s		n
Cnn 1-1149	Cnn 602-1149	n		his 0mM s		n	medium
Cnn 1-1149	Cnn 1-608	n		his 0mM s		n	medium	medium
Cnn 1-1149	Cnn 1-816	n		his 0mM s		n
Cnn 1-1149	Cnn 196-1002	n		his 0mM s		n	weak
Cnn 1-1149	Cnn 196-816	n		his 0mM s		n	weak
Cnn 1-1149	DSpd-2 437-875	n		his 0mM m		n
Cnn 1-1149	DSpd-2 437-1146	n		his 0mM m		n
Cnn 1-1149	DSpd-2 654-1078	n		his 0mM m		n
Cnn 1-1149	DSpd-2 654-1146	n		his 0mM m		n
Cnn 1-1149	DSpd-2 1-443	n		his 0mM s	fails retest	n	medium	strong
Cnn 1-1149	DSpd-2 1-660	n		his 0mM m		n
Cnn 1-1149	DSpd-2 1-875	n		his 0mM m		n
Cnn 1-1149	DSpd-2 202-1078	n		his 0mM m		n
Cnn 1-1149	DSpd-2 202-660	n		his 0mM m		n
Cnn 1-1149	DSpd-2 202-875	n		his 0mM m		n
Cnn 299-608	Asl 399-612				fails retest			medium
Cnn 299-608	Cnn 1-1149	n		his 0mM s		n
Cnn 299-608	Cnn 403-608	n		his 0mM s		n	medium	strong
Cnn 299-608	Cnn 403-1002	n		his 0mM s		n		medium
Cnn 299-608	Cnn 403-1149	n		his 0mM s		n
Cnn 299-608	Cnn 602-1002	n		his 0mM s		n
Cnn 299-608	Cnn 602-1149	n		his 0mM w		n
Cnn 299-608	Cnn 1-608	n		his 0mM s		n
Cnn 299-608	Cnn 1-816	n		his 0mM s		n
Cnn 299-608	Cnn 196-1002	n		his 0mM s		n
Cnn 299-608	Cnn 196-608	n		his 0mM s		n	weak	medium
Cnn 299-608	Cnn 196-816	n		his 0mM s		n		weak
Cnn 1-305	Cnn 602-816	n		his 0mM w		n
Cnn 1-305	Cnn 1-202	n		his 0mM s		n
Cnn 1-305	Cnn 1-409	n		his 0mM s		n
Cnn 1-305	Cnn 1-608	n		his 0mM s		n		weak
Cnn 1-305	Cnn 1-816	n		his 0mM s		n
Cnn 1-608	Cnn 810-1002	n		his 0mM m		n
Cnn 1-608	Cnn 1-1149	n		his 0mM s		n
Cnn 1-608	Cnn 403-608	n		his 0mM s		n	weak
Cnn 1-608	Cnn 403-1002	n		his 0mM s		n
Cnn 1-608	Cnn 403-1149	n		his 0mM m		n
Cnn 1-608	Cnn 602-816	n		his 0mM m		n
Cnn 1-608	Cnn 602-1149	n		his 0mM m		n
Cnn 1-608	Cnn 1-202	n		his 0mM s		n
Cnn 1-608	Cnn 1-608	n		his 0mM s		n	weak
Cnn 1-608	Cnn 1-816	n		his 0mM m		n
Cnn 1-608	Cnn 196-1002	n		his 0mM s		n
Cnn 1-608	Cnn 196-816	n		his 0mM s		n
DSpd-2 869-1146	DSpd-2 437-875	n		his 0mM w		n		weak
DSpd-2 869-1146	DSpd-2 654-1078	n		his 0mM w		n		weak
DSpd-2 869-1146	DSpd-2 202-1078							medium
DSpd-2 437-1146	Asl 204-803	n		his 0mM m	fails retest	n
DSpd-2 437-1146	Asl 204-994	n		his 0mM m		n
DSpd-2 437-1146	DSpd-2 654-1146	n		his 0mM m		n
DSpd-2 1-443	Asl 606-994	n		his 0mM s		n	strong	medium
DSpd-2 1-443	Asl 399-994	n		his 0mM w		n	strong
DSpd-2 1-443	Asl 204-994	n		his 0mM s		n	weak	medium
DSpd-2 1-443	Asl 204-994	n		his 0mM m		n	weak
DSpd-2 1-875	Asl 399-994							strong
DSpd-2 1-875	Asl 204-994	n		his 0mM m		n	v weak
DSpd-2 1-875	Cnn 1-409	n		his 0mM s	fails retest	n	medium	medium
