# Supplementary figures and images for: A molecular mechanism of mitotic centrosome assembly in Drosophila
Source: eLife journal article supplement (doi:10.7554/elife.03399), 2014-08-22

# Figure 1 - Figure Supplement 1

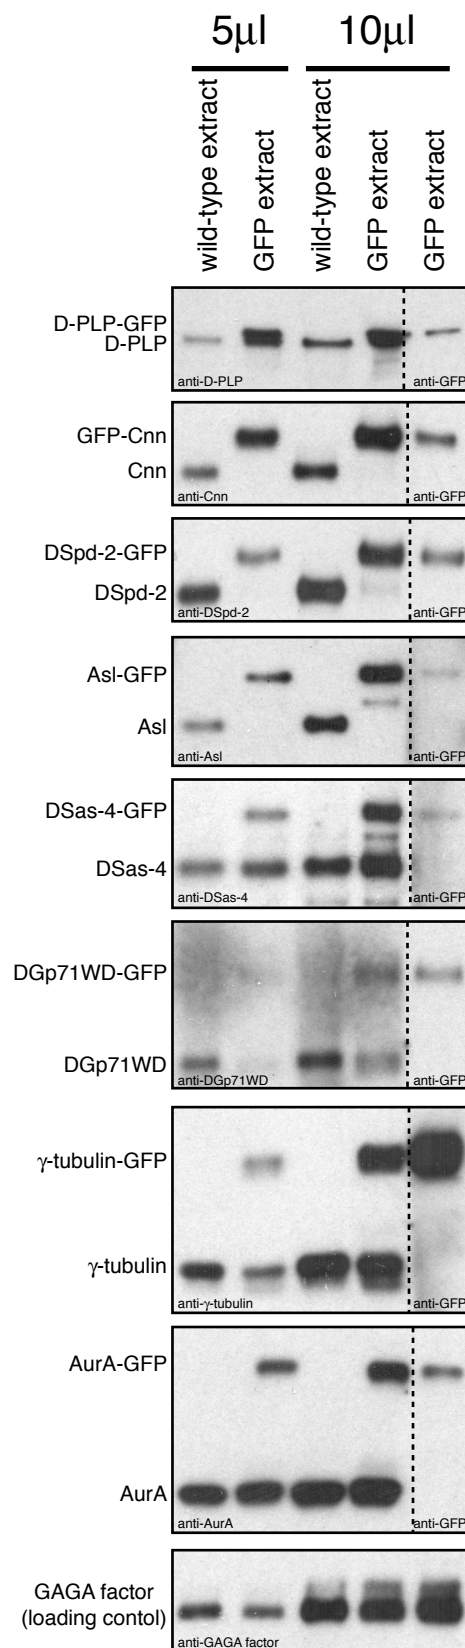

Supplement: supp [file elife_poa_e03399_Figure_1_figure_supplement_1.pdf › elife_poa_e03399_Figure_1_figure_supplement_1.pdf]

Figure 1 -  
Figure Supplement 2

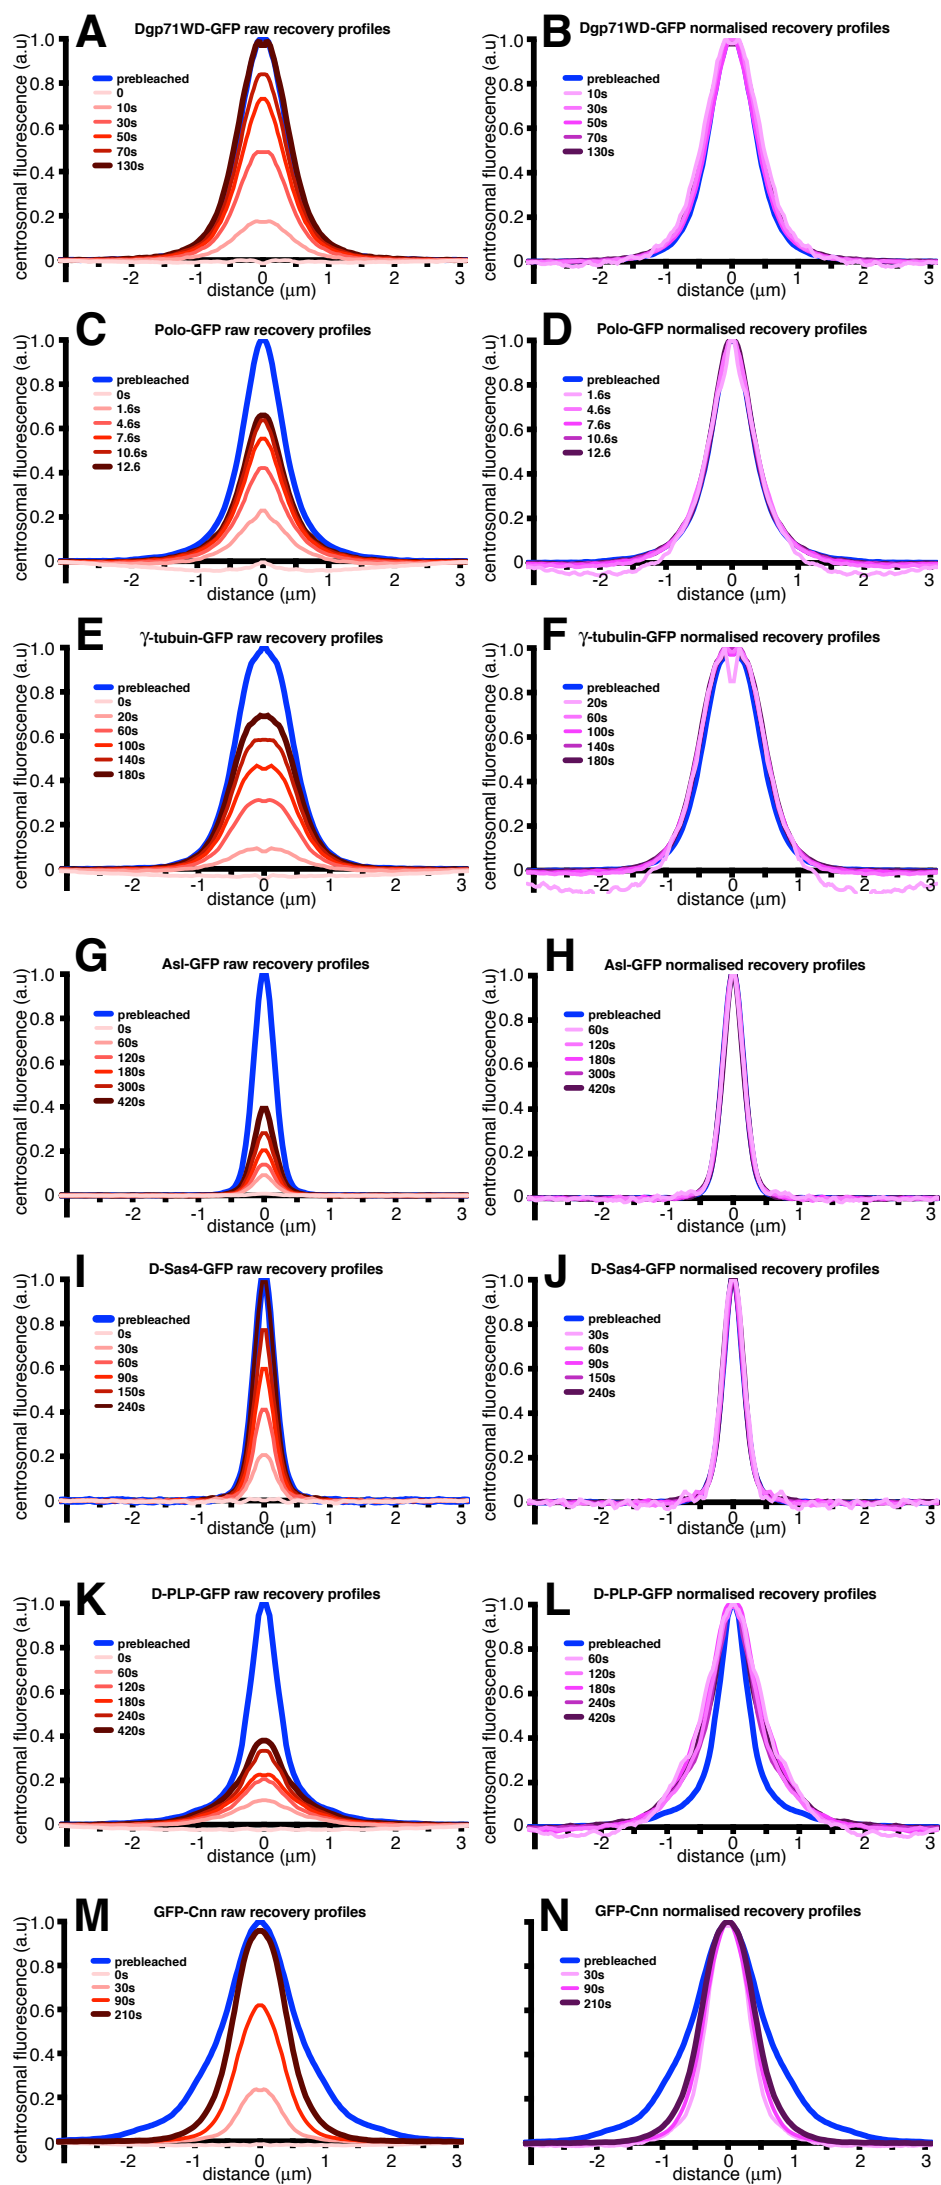

Supplement: supp [file elife_poa_e03399_Figure_1_figure_supplement_2.pdf › elife_poa_e03399_Figure_1_figure_supplement_2.pdf]

**Figure 3 - Figure Supplement 1**

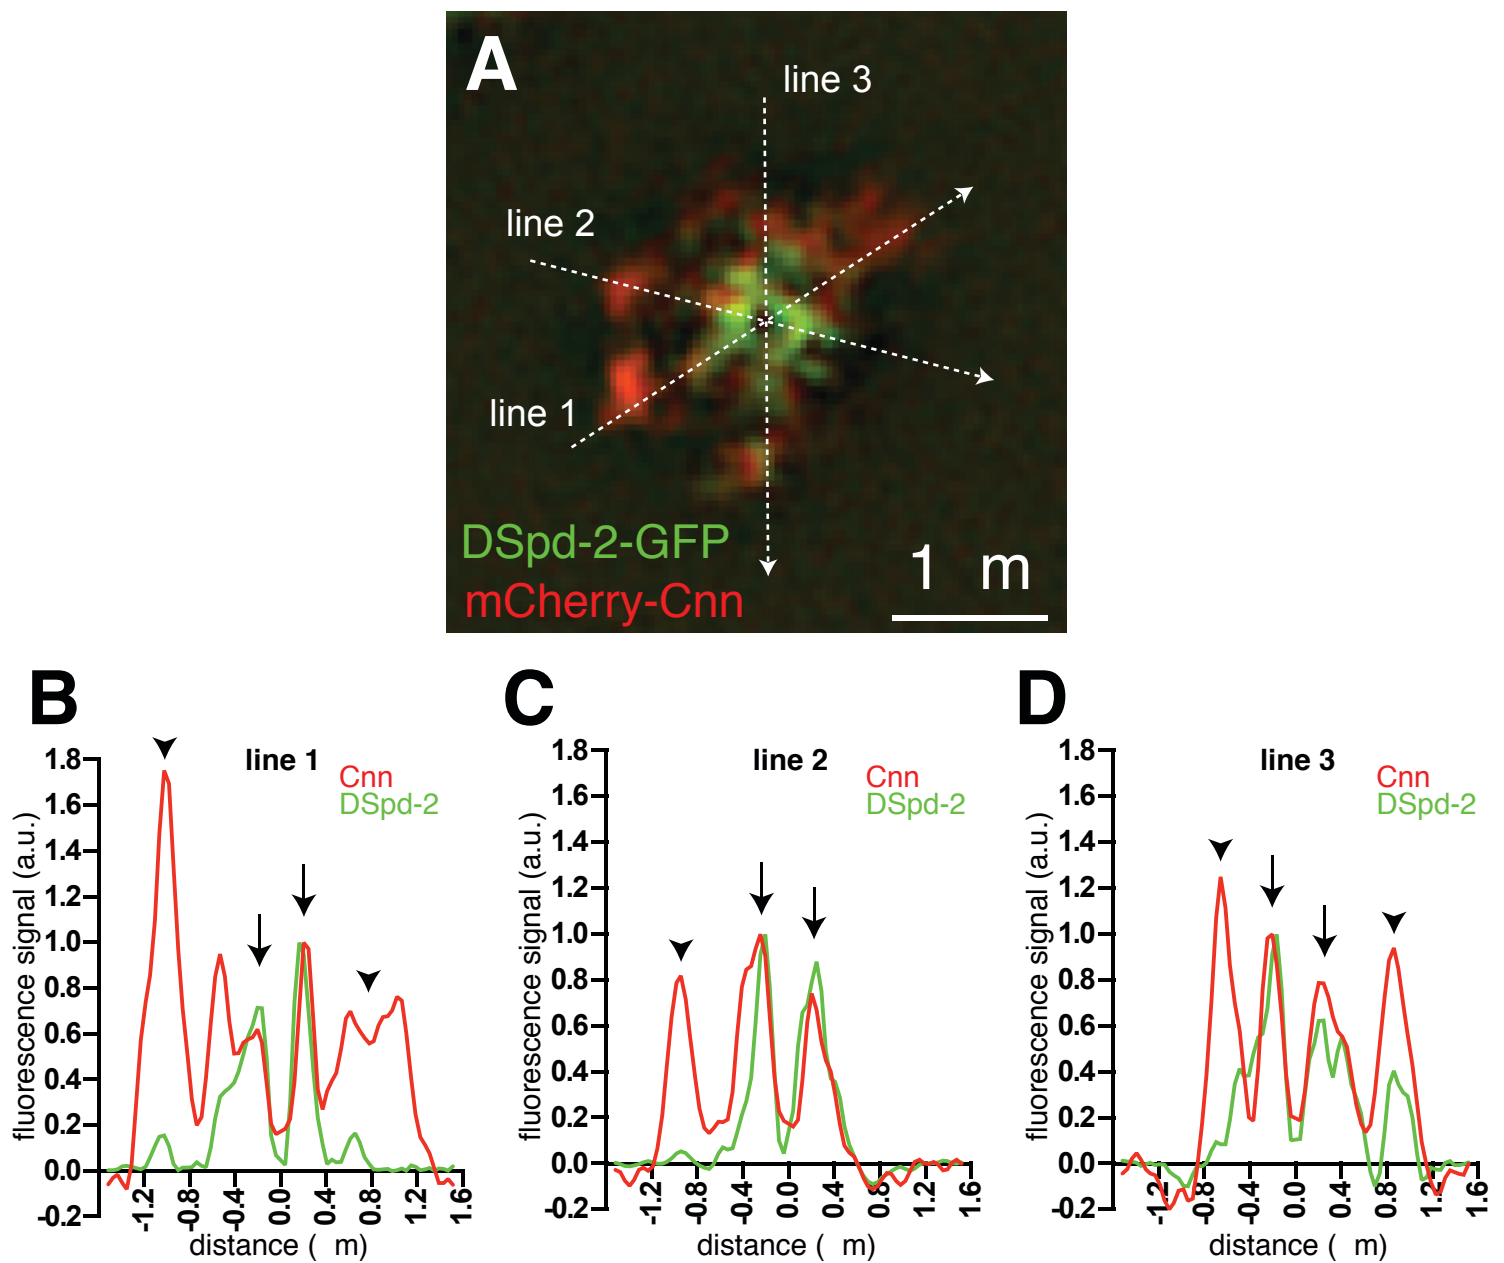

Supplement: supp [file elife_poa_e03399_Figure_3_figure_supplement_1.pdf › elife_poa_e03399_Figure_3_figure_supplement_1.pdf]

# Figure 9 - Figure Supplement 1

**A**

## *cnn;tacc* mutant brains

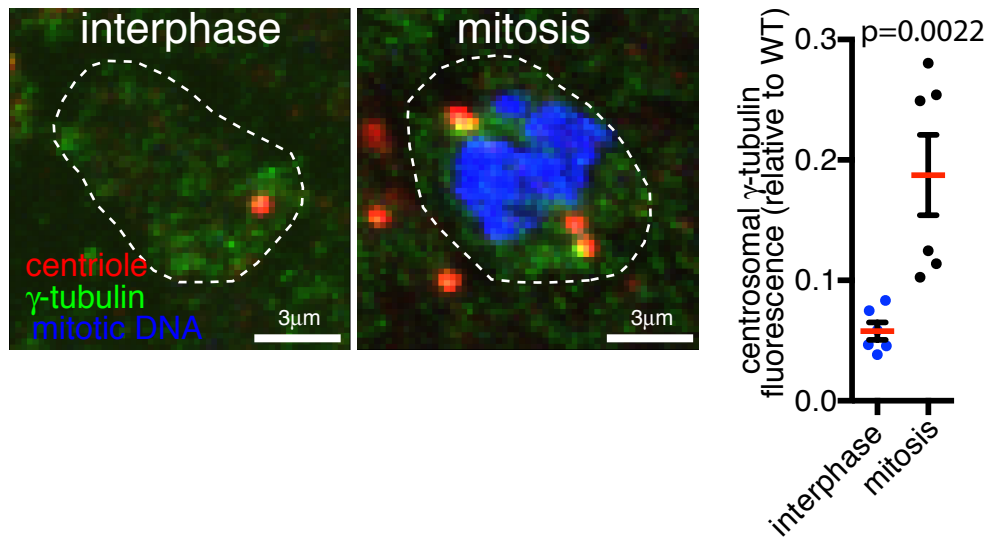

**B**

## *DSpd2;tacc* mutant brains

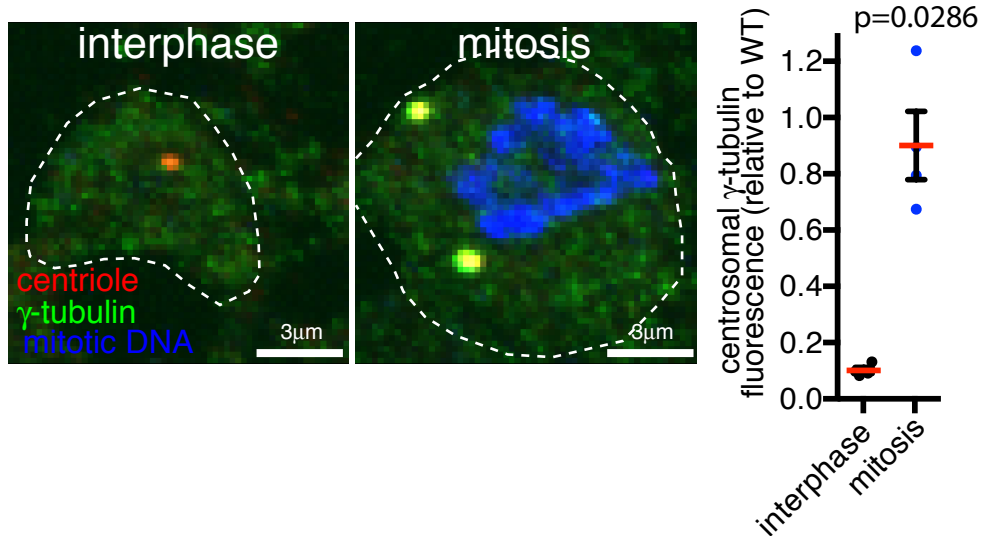

Supplement: supp [file elife_poa_e03399_Figure_9_figure_supplement_1.pdf › elife_poa_e03399_Figure_9_figure_supplement_1.pdf]

**Figure 9 - Figure Supplement 2**

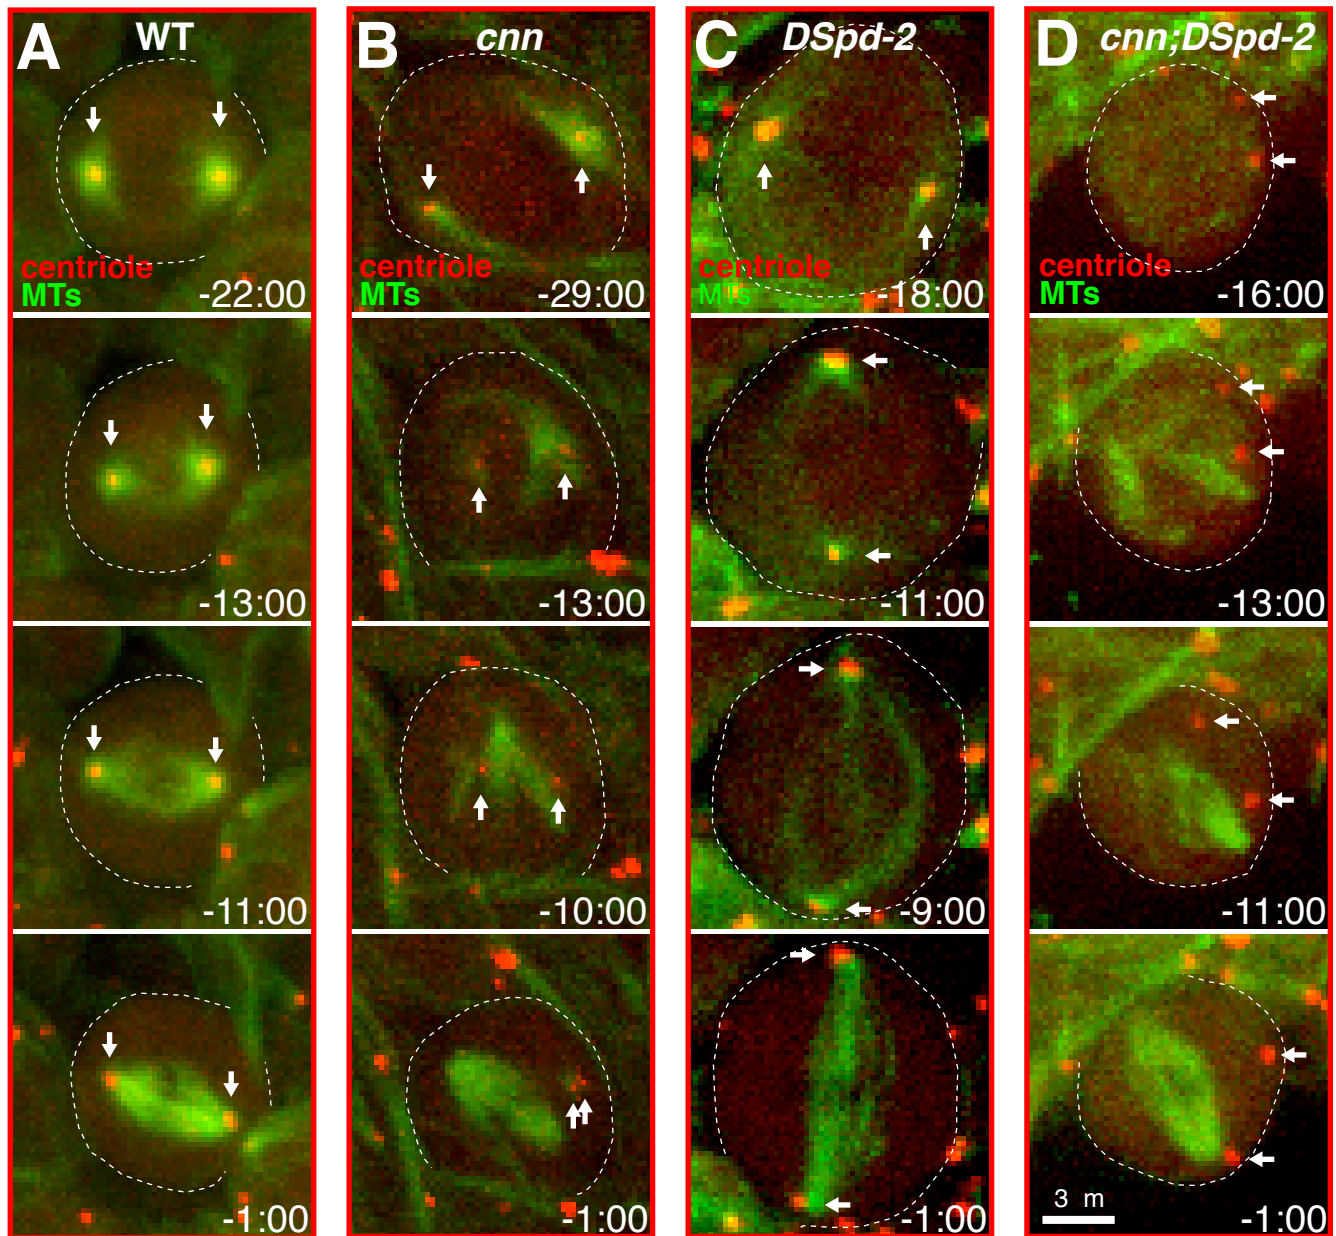

Supplement: supp [file elife_poa_e03399_Figure_9_figure_supplement_2.pdf › elife_poa_e03399_Figure_9_figure_supplement_2.pdf]
